# Supplementary material
Source: PubMed Central journal article supplement (PMC8887795)
Supplement: NIHMS1767277-supplement-1.pdf [file NIHMS1767277-supplement-1.pdf]

**A**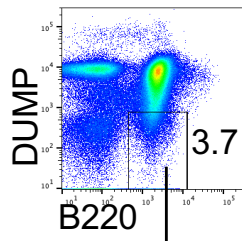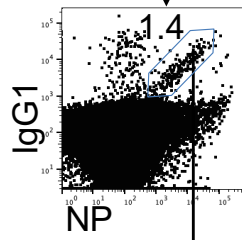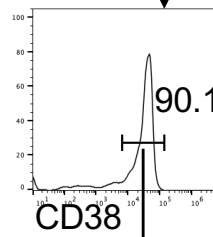

Memory B cells

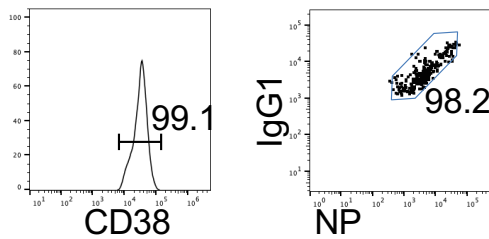**B**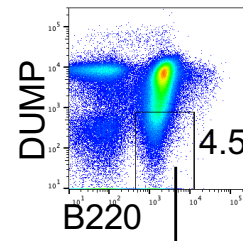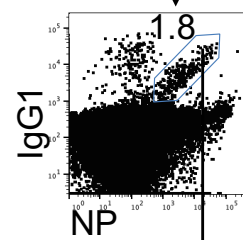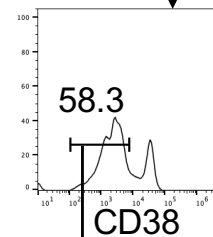

GC B cells

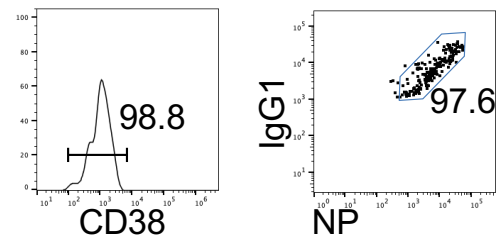

**Supplemental Figure 1.** Sorting of memory and GC B cells by flow cytometry. (A) Sorting of IgM-IgD-CD138-CD11b-CD11c-CD4-CD8<sup>-</sup> (DUMP<sup>-</sup>) B220<sup>+</sup>NP<sup>+</sup>IgG<sup>+</sup>CD38<sup>+</sup> NP-specific memory B cells from the spleen of C57BL/6 mice 8 weeks after immunization with NP-KLH. (B) Sorting of DUMP<sup>-</sup>B220<sup>+</sup>NP<sup>+</sup>IgG<sup>+</sup>CD38<sup>-</sup> NP-specific germinal center (GC) B cells from the spleen of C57BL/6 mice 2 weeks after immunization with NP-KLH.

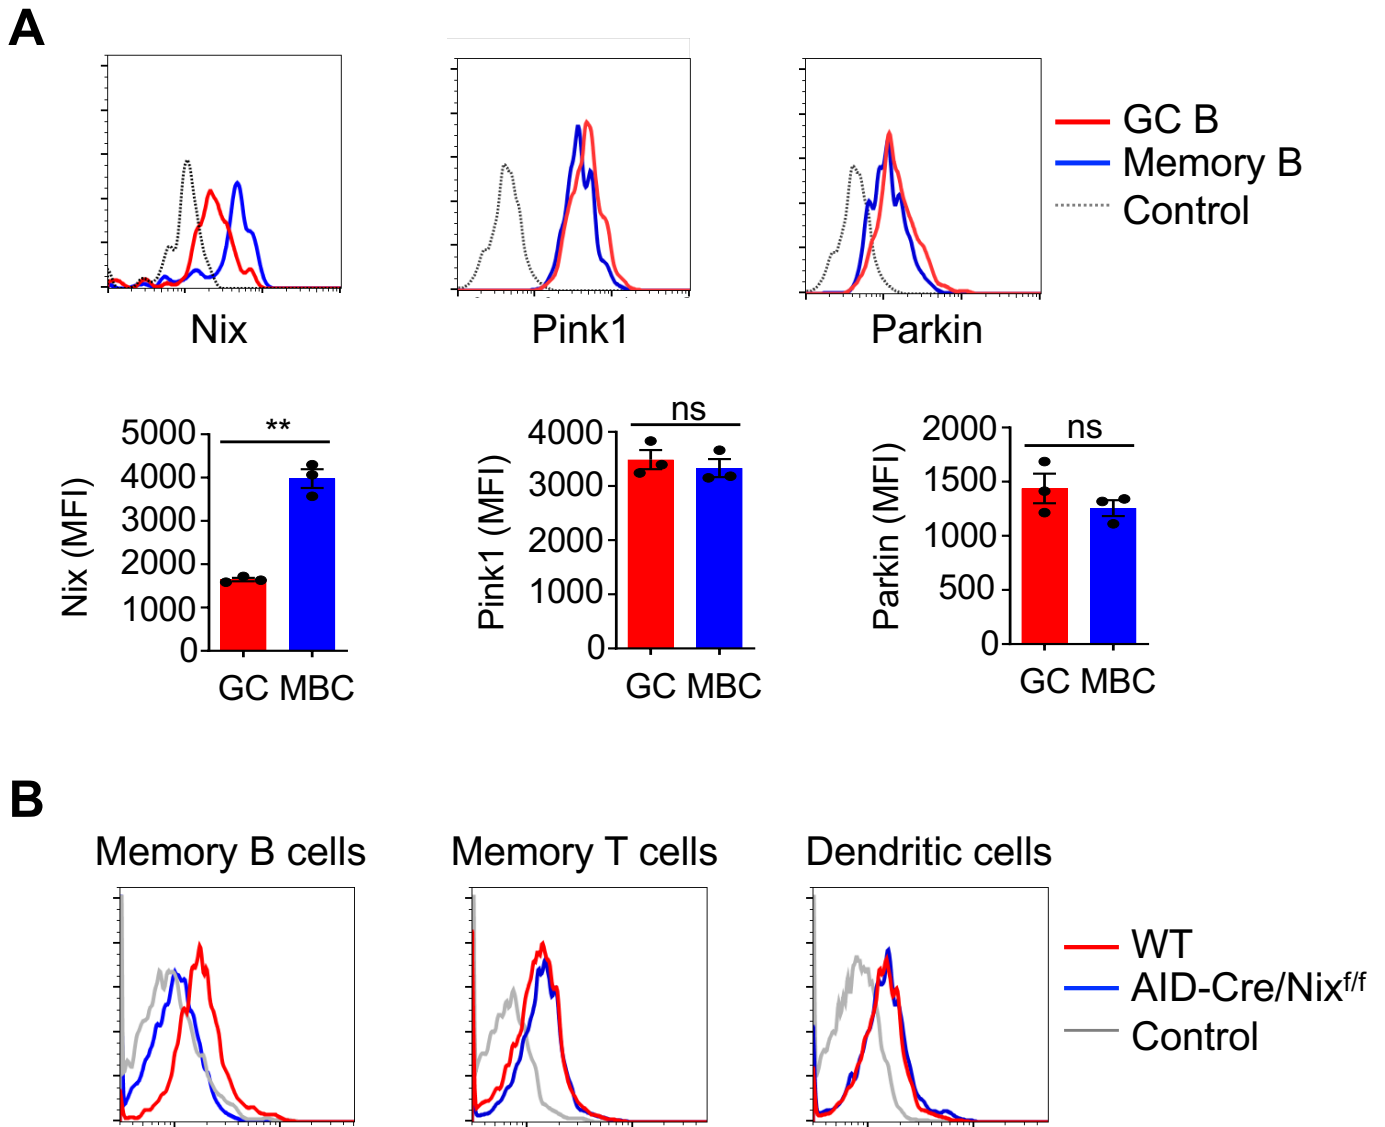

**Supplemental Figure 2.** The expression of proteins that regulate mitochondrial autophagy. (A) Flow cytometry analyses of intracellular staining for Nix, Pink1, and Parkin in DUMP-B220<sup>+</sup>NP<sup>+</sup>IgG<sup>+</sup>CD38<sup>+</sup> memory B cells and DUMP-B220<sup>+</sup>IgG<sup>+</sup>GL-7<sup>+</sup>CD38<sup>-</sup> GC B cells. Dashed black line, isotype control; red line, GC B cell; blue line, memory B cell. Data are representative of three independent experiments. **\*\*** $P < 0.01$ ; ns = not statistically significant. (B) Splenocytes from wild type (WT) and AID-Cre/Nix<sup>ff</sup> mice were stained for cell surface markers, followed by intracellular staining for Nix. The cells were analyzed by flow cytometry. The staining for Nix was plotted for DUMP-B220<sup>+</sup>NP<sup>+</sup>IgG<sup>+</sup>CD38<sup>+</sup> memory B cells, CD4<sup>+</sup>CD44<sup>+</sup>CD62L<sup>+</sup> memory T cells and CD11c<sup>+</sup>CD11b<sup>+</sup> dendritic cells.

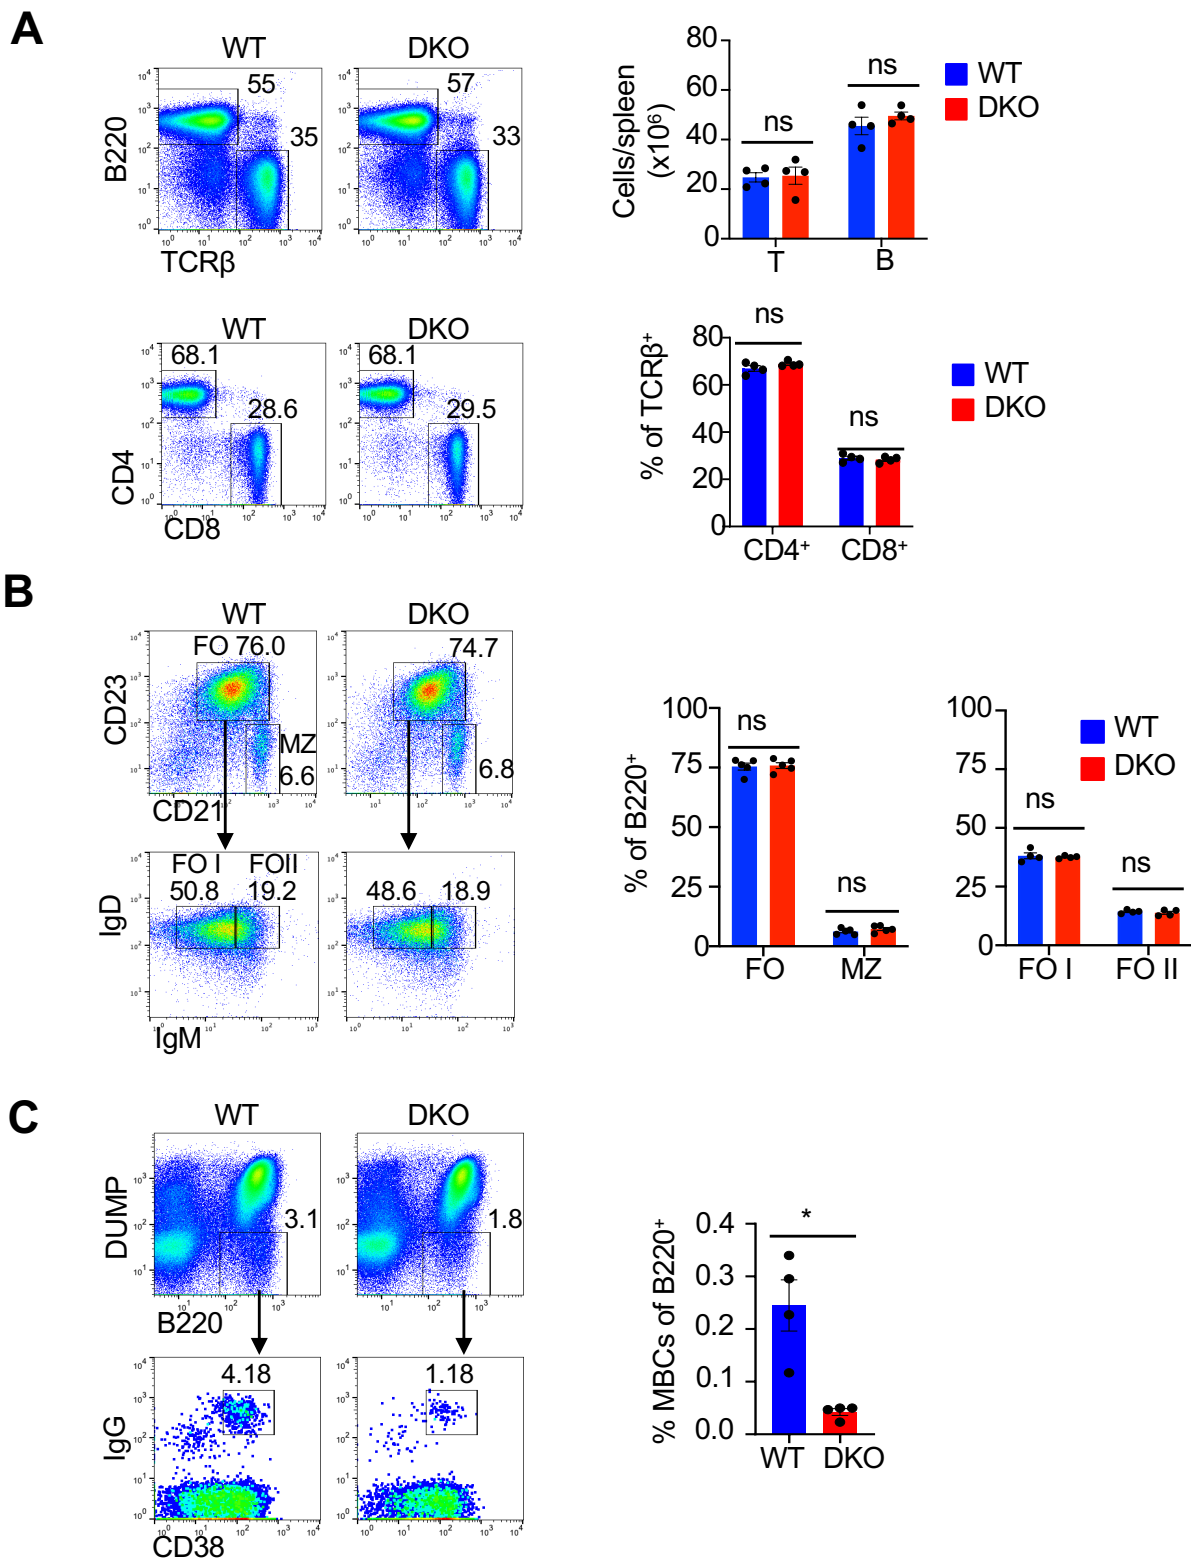

**Supplementary Figure 3.** Flow cytometry analyses of T and B cells in wild type and DKO mice. (A) Flow cytometry analyses of T and B cells in wild type (WT) and DKO mice. (B) Flow cytometry analyses of B220 $^+$ CD23 $^+$ CD21 $^{\text{lo}}$  follicular (FO) B cells, B220 $^+$ CD23 $^{\text{lo}}$ CD21 $^{\text{hi}}$  marginal zone (MZ) B cells. FO B cells are further gated into naive IgD $^+$ IgM $^{\text{low}}$  follicular type I (FO I) cells dependent on signaling from antigens, and IgD $^+$ IgM $^{\text{high}}$  follicular type II cells (FO II) cells independent of antigens for development (Cariappa et al., *J. Immunol.*179: 2270-2281). (C) Spontaneously arising DUMP $^+$ B220 $^+$ IgG $^+$ CD38 $^+$  memory B cells in wild type and DKO mice. Data are presented as mean  $\pm$  s.e.m. \* $P < 0.05$ ; ns = not significant.

Supplemental Table 1. DEGs in DKO memory B cells.

| Genes up in DKO      | Log2 fold change | FDR      |
|----------------------|------------------|----------|
| <i>St6galnac1</i>    | 4.122999603      | 1.06E-08 |
| <i>Rad9b</i>         | 4.096057929      | 2.19E-10 |
| <i>Mdc1</i>          | 4.057110855      | 5.50E-10 |
| <i>Aar2</i>          | 3.188840421      | 5.63E-06 |
| <i>Catsper3</i>      | 3.127444228      | 5.75E-06 |
| <i>Atg2b</i>         | 3.036940157      | 3.88E-09 |
| <i>Sdhaf2</i>        | 2.977996082      | 8.47E-07 |
| <i>Gm12333</i>       | 2.906201952      | 0.000381 |
| <i>Abca17</i>        | 2.887343996      | 7.66E-09 |
| <i>A230046K03Rik</i> | 2.882175153      | 5.59E-08 |
| <i>Gm14226</i>       | 2.874927335      | 0.000182 |
| <i>G530011O06Rik</i> | 2.834046061      | 0.000149 |
| <i>Ecd</i>           | 2.807036229      | 2.32E-05 |
| <i>Acsf3</i>         | 2.789620943      | 0.000301 |
| <i>Sdhc</i>          | 2.776760722      | 0.000987 |
| <i>Casc4</i>         | 2.742479596      | 1.59E-06 |
| <i>Itgad</i>         | 2.728952859      | 1.57E-06 |
| <i>Mttr7</i>         | 2.692508268      | 0.000196 |
| <i>Uvssa</i>         | 2.588317437      | 3.18E-07 |
| <i>Calu</i>          | 2.586958441      | 2.00E-06 |
| <i>Fn3krp</i>        | 2.573733607      | 1.44E-05 |
| <i>Pdik11</i>        | 2.560997293      | 4.93E-08 |
| <i>Galnt1</i>        | 2.554133875      | 8.00E-05 |
| <i>1300002E11Rik</i> | 2.537337724      | 0.001117 |
| <i>Alg8</i>          | 2.510902126      | 0.000594 |
| <i>Dmbx1</i>         | 2.506447973      | 2.57E-05 |
| <i>Pex1</i>          | 2.497877128      | 7.63E-06 |
| <i>Ddx19b</i>        | 2.488873736      | 1.23E-05 |
| <i>G6pc</i>          | 2.44471001       | 2.25E-05 |
| <i>Gm14120</i>       | 2.406782098      | 0.001501 |
| <i>Irf6</i>          | 2.330206977      | 0.001117 |
| <i>Slmap</i>         | 2.32811851       | 1.15E-05 |
| <i>Acly</i>          | 2.321266646      | 0.000224 |
| <i>Brip1os</i>       | 2.307574175      | 0.002516 |
| <i>Il2rb</i>         | 2.287528235      | 4.14E-05 |
| <i>Il2ra2</i>        | 2.282754591      | 0.005847 |
| <i>Anapc5</i>        | 2.254719685      | 4.45E-06 |
| <i>Decr2</i>         | 2.25137893       | 5.31E-05 |
| <i>Ahctf1</i>        | 2.236047564      | 6.93E-06 |
| <i>Nphs1</i>         | 2.229174837      | 0.000145 |
| <i>Mvp</i>           | 2.226061956      | 0.000728 |
| <i>Lrrc16a</i>       | 2.204258314      | 2.69E-05 |
| <i>Ccnj</i>          | 2.172857972      | 0.001309 |
| <i>Sixn2</i>         | 2.170896004      | 0.00148  |
| <i>Tctn2</i>         | 2.145187261      | 1.43E-05 |
| <i>Kctd4</i>         | 2.122021983      | 0.002427 |
| <i>Luc7l</i>         | 2.11554433       | 8.14E-06 |
| <i>Metap1</i>        | 2.111368864      | 0.006833 |
| <i>Klhl15</i>        | 2.098373168      | 0.018665 |
| <i>R3hdm2</i>        | 2.084257426      | 0.000108 |
| <i>Rapgef5</i>       | 2.083807872      | 0.000223 |
| <i>Paqr5</i>         | 2.081510877      | 7.57E-05 |
| <i>Rab8b</i>         | 1.987536997      | 0.000452 |
| <i>Parp12</i>        | 1.984149355      | 0.00046  |
| <i>Slc17a2</i>       | 1.980760236      | 0.000661 |
| <i>Psmb7</i>         | 1.94978778       | 0.004053 |
| <i>A430093F15Rik</i> | 1.917944034      | 0.001309 |
| <i>Irfar1</i>        | 1.905155283      | 0.001043 |
| <i>Nol9</i>          | 1.900266549      | 0.000196 |
| <i>Pbx3</i>          | 1.842448445      | 0.002243 |
| <i>Ankrd13a</i>      | 1.812579063      | 0.000927 |
| <i>Ifr74</i>         | 1.808379143      | 0.01137  |
| <i>Sptan1</i>        | 1.800762142      | 0.000438 |
| <i>Cramp1l</i>       | 1.794223352      | 0.00026  |
| <i>Polr2a</i>        | 1.793453006      | 0.000197 |
| <i>Ago3</i>          | 1.772806606      | 3.15E-05 |
| <i>Pank2</i>         | 1.768896218      | 0.002836 |
| <i>Cybrd1</i>        | 1.767930057      | 0.000915 |
| <i>Zfp709</i>        | 1.764812139      | 0.000203 |

| Genes up in DKO      | Log2 fold change | FDR      |
|----------------------|------------------|----------|
| <i>Ddx42</i>         | 1.744424048      | 0.00046  |
| <i>Ms4a7</i>         | 1.742795652      | 0.03185  |
| <i>Pak2</i>          | 1.741096729      | 0.00046  |
| <i>Srpk1</i>         | 1.737212042      | 4.31E-05 |
| <i>Cul2</i>          | 1.7312104        | 0.003526 |
| <i>Pum1</i>          | 1.719740714      | 0.000236 |
| <i>F830045P16Rik</i> | 1.714444326      | 0.022947 |
| <i>Zbtb6</i>         | 1.711027477      | 0.008781 |
| <i>Nktr</i>          | 1.708668356      | 0.000341 |
| <i>Slc35a5</i>       | 1.707351827      | 0.012114 |
| <i>Cd200r3</i>       | 1.69342454       | 0.002968 |
| <i>2010012O05Rik</i> | 1.69052754       | 0.023758 |
| <i>Rbm27</i>         | 1.685148137      | 0.023147 |
| <i>Cse1l</i>         | 1.676691843      | 0.00026  |
| <i>Nrd1</i>          | 1.675381451      | 0.003904 |
| <i>0610007P14Rik</i> | 1.659967784      | 0.004531 |
| <i>Dgkg</i>          | 1.647853475      | 0.000767 |
| <i>Rragc</i>         | 1.637017196      | 0.001116 |
| <i>Fbxw2</i>         | 1.613828714      | 0.004671 |
| <i>Cep104</i>        | 1.613205142      | 0.022844 |
| <i>Acss2</i>         | 1.603774842      | 0.011012 |
| <i>Eya3</i>          | 1.559369514      | 0.001346 |
| <i>Gbp4</i>          | 1.557062563      | 0.004896 |
| <i>Dhrs2</i>         | 1.533657655      | 0.022844 |
| <i>Nufip2</i>        | 1.531617208      | 0.012081 |
| <i>Kdm1a</i>         | 1.517307632      | 0.001573 |
| <i>Gm14245</i>       | 1.515283847      | 0.00996  |
| <i>Cep128</i>        | 1.512284028      | 0.003104 |
| <i>Sntb2</i>         | 1.510850398      | 0.031863 |
| <i>Dis3l2</i>        | 1.506210315      | 0.003049 |
| <i>BC028471</i>      | 1.502929328      | 0.008493 |
| <i>Zyg11b</i>        | 1.500837136      | 0.000705 |
| <i>Psmc7</i>         | 1.462035163      | 0.040493 |
| <i>Map3k12</i>       | 1.460097746      | 0.008512 |
| <i>Dnmt3b</i>        | 1.449613993      | 0.008066 |
| <i>Klhdc2</i>        | 1.445716933      | 0.018138 |
| <i>Med23</i>         | 1.427999534      | 0.010952 |
| <i>Dpy19l4</i>       | 1.426271602      | 0.0074   |
| <i>App1</i>          | 1.41376369       | 0.005242 |
| <i>Hps5</i>          | 1.405853915      | 0.002234 |
| <i>Ube2r2</i>        | 1.398074655      | 0.044242 |
| <i>Map3k19</i>       | 1.389880011      | 0.007579 |
| <i>Mtf1</i>          | 1.384271061      | 0.022868 |
| <i>Mycbp2</i>        | 1.361482534      | 0.001348 |
| <i>Dpf2</i>          | 1.35961585       | 0.01085  |
| <i>Ptpn9</i>         | 1.357199657      | 0.01906  |
| <i>Fam149b</i>       | 1.34939751       | 0.022825 |
| <i>Pbrm1</i>         | 1.343160271      | 0.006738 |
| <i>0610037L13Rik</i> | 1.32947624       | 0.008452 |
| <i>RP23-180L12.5</i> | 1.324305008      | 0.008461 |
| <i>Gm7120</i>        | 1.311438593      | 0.020112 |
| <i>Tgm4</i>          | 1.305743634      | 0.01906  |
| <i>Capn7</i>         | 1.304944606      | 0.01028  |
| <i>Atxn1</i>         | 1.296453063      | 0.02088  |
| <i>Ncor1</i>         | 1.284714714      | 0.00424  |
| <i>Esd</i>           | 1.28141259       | 0.040872 |
| <i>A530013C23Rik</i> | 1.273807444      | 0.044242 |
| <i>Rbbp4</i>         | 1.269519138      | 0.011993 |
| <i>Zranb3</i>        | 1.261998631      | 0.031144 |
| <i>Rhot1</i>         | 1.254618003      | 0.006258 |
| <i>Rdx</i>           | 1.250820206      | 0.027614 |
| <i>Nf1</i>           | 1.240638259      | 0.005038 |
| <i>Brca1</i>         | 1.239349513      | 0.012779 |
| <i>Nfatc3</i>        | 1.234409798      | 0.024464 |
| <i>Lrp2</i>          | 1.231376792      | 0.019693 |
| <i>Dnase1l3</i>      | 1.227773081      | 0.025179 |
| <i>Zfp143</i>        | 1.223115815      | 0.020401 |
| <i>Golga3</i>        | 1.223039941      | 0.014168 |
| <i>Tmem183a</i>      | 1.203720453      | 0.037793 |

| Genes up in DKO      | Log2 fold change | FDR      |
|----------------------|------------------|----------|
| <i>Cdca5</i>         | 1.19176391       | 0.015313 |
| <i>Parp14</i>        | 1.190749987      | 0.033721 |
| <i>Serac1</i>        | 1.189947428      | 0.03069  |
| <i>Nmt2</i>          | 1.187961067      | 0.025561 |
| <i>Dixdc1</i>        | 1.181876321      | 0.039747 |
| <i>Unc80</i>         | 1.156367754      | 0.018756 |
| <i>Qsox2</i>         | 1.150439661      | 0.040872 |
| <i>Tet1</i>          | 1.126183963      | 0.024082 |
| <i>Prkcb</i>         | 1.122446808      | 0.04879  |
| <i>Rbbp6</i>         | 1.109116172      | 0.023758 |
| <i>Txndc16</i>       | 1.108430438      | 0.046727 |
| <i>Commf2</i>        | 1.097159779      | 0.039196 |
| <i>Dnah12</i>        | 1.090361472      | 0.035869 |
| <i>Rad51</i>         | 1.087325313      | 0.028755 |
| <i>Nlrp4g</i>        | 1.082880468      | 0.038062 |
| <i>Slk</i>           | 1.074205973      | 0.02388  |
| <i>Efr3a</i>         | 1.071240718      | 0.047312 |
| <i>Ddx5</i>          | 1.068705713      | 0.04493  |
| <i>Tug1</i>          | 1.047291675      | 0.045817 |
| <i>Phff1</i>         | 1.045643562      | 0.03101  |
| <i>Kpnb1</i>         | 1.042070824      | 0.0237   |
| <i>Trp53bp1</i>      | 1.028233712      | 0.037354 |
| <i>4933427D14Rik</i> | 1.027100219      | 0.040549 |
| <i>Gapvd1</i>        | 1.02667783       | 0.025561 |
| <i>Gm1564</i>        | 1.021188194      | 0.038917 |
| <i>Vps4b</i>         | 1.012667825      | 0.045494 |
| <i>Brd2</i>          | 1.000114741      | 0.04466  |
| <i>Trpm7</i>         | 0.961857391      | 0.045138 |
| <i>2610507B11Rik</i> | 0.951462023      | 0.026563 |
| <i>Ern1</i>          | 0.86155012       | 0.049354 |
| <i>Herc1</i>         | 0.837804502      | 0.034702 |

| Genes down in DKO    | Log2 fold change | FDR      |
|----------------------|------------------|----------|
| <i>Dlg2</i>          | -2.470499333     | 6.15E-07 |
| <i>Arrdc4</i>        | -2.521807518     | 9.58E-08 |
| <i>Chst15</i>        | -2.525201801     | 2.01E-09 |
| <i>Ank3</i>          | -2.547251164     | 1.41E-07 |
| <i>Snx30</i>         | -2.577621882     | 2.01E-09 |
| <i>Neil3</i>         | -2.582525888     | 3.03E-09 |
| <i>Dlgap5</i>        | -2.59348869      | 9.52E-08 |
| <i>Gm13857</i>       | -2.600710033     | 3.12E-08 |
| <i>Nagk</i>          | -2.618133159     | 1.26E-06 |
| <i>Kif1a</i>         | -2.62000992      | 3.03E-09 |
| <i>Mrp1</i>          | -2.644611195     | 8.22E-07 |
| <i>Igdccc4</i>       | -2.679163882     | 4.19E-06 |
| <i>Lypla1</i>        | -2.68174155      | 2.19E-10 |
| <i>mt-Nd4l</i>       | -2.720122045     | 2.44E-07 |
| <i>Kpna2</i>         | -2.72706202      | 4.93E-08 |
| <i>Rnf122</i>        | -2.760744697     | 0.000145 |
| <i>Ppil6</i>         | -2.770236023     | 2.66E-06 |
| <i>Plcg1</i>         | -2.770243594     | 3.66E-09 |
| <i>Gls2</i>          | -2.791254461     | 5.01E-08 |
| <i>2810007J24Rik</i> | -2.855011679     | 1.50E-05 |
| <i>Slc22a12</i>      | -2.938237704     | 0.004531 |
| <i>Tbc1d8</i>        | -2.953640948     | 1.16E-09 |
| <i>Arhgef7</i>       | -3.000479244     | 4.48E-10 |
| <i>Ltf</i>           | -3.040991579     | 1.16E-09 |
| <i>Vmn2r60</i>       | -3.051204506     | 3.75E-08 |
| <i>Rbm26</i>         | -3.066352422     | 2.34E-09 |
| <i>Ube2u</i>         | -3.074919462     | 4.85E-08 |
| <i>Gm11400</i>       | -3.172592438     | 3.30E-10 |
| <i>Heat2</i>         | -3.186045797     | 2.05E-08 |
| <i>Col7a1</i>        | -3.271949745     | 7.87E-11 |
| <i>RP23-8J15.2</i>   | -3.323651289     | 2.78E-09 |
| <i>Aip</i>           | -3.363138595     | 3.71E-11 |
| <i>Tmem44</i>        | -3.842169955     | 2.83E-12 |
| <i>Gm8979</i>        | -3.850449842     | 7.60E-07 |
| <i>4933426M11Rik</i> | -4.245422775     | 3.53E-17 |
